# Supplementary material
Source: Springer Nature journal article supplement (https://www.springermedizin.de/resource/supplementary/12985_2013_2290_MOESM7_ESM.pdf/9606430)

# Nasal virus excretion

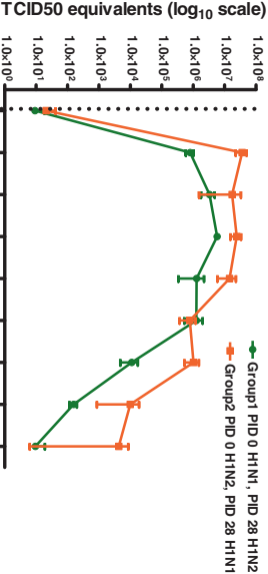

Supplement: MOESM7 [file 9606430]
